# Supplementary material for: New insights into the charge storage chemistry of polymer cathodes in aqueous Zn batteries
Source: Royal Society of Chemistry journal article supplement (doi:10.1039/d4ta01336k), 2024-01-01
Supplement: d4ta01336k1.pdf [file d4ta01336k1.pdf]

## **Supplementary Material**

# **New insights into the charge storage chemistry of polymer cathodes in aqueous Zn batteries**

*Xiangcheng Yuan, Zhengjie Wang, Yiqing Li, Mi Gan, Chen Si\*, Jinzhang Liu\**

School of Materials Science and Engineering, Beihang University, Beijing 100083,  
China

\*Corresponding author

E-mail: sichen@buaa.edu.cn (C. Si), ljz78@buaa.edu.cn (J. Liu).

## 1. Calculation for the Activation Energy Using CV Curves

For a CV loop, the redox peak current  $I_p$  is expressed as:

$$I_p = A\sqrt{v}e^{-E_A/RT} / T \quad (\text{S1})$$

Where A is a constant,  $v$  is the voltage scan rate,  $E_{A_{\text{tr}}}$  is the activation energy, R is the gas constant, and T is the absolute temperature. Eq.(1) can be transformed into:

$$\ln I_p = \ln + \frac{1}{2} \left( \ln \frac{v}{T} - \frac{E_A}{RT} - \ln T \right) \quad (\text{S2})$$

When at constant  $v$ , using the reduction peak intensities,  $I_1$  and  $I_2$ , of two CV curves at temperatures of  $T_1$  and  $T_2$ , respectively, we obtain:

$$E_A = \frac{\left( 2 \ln \frac{I_1}{I_2} - \ln \frac{T_2}{T_1} \right) RT_1 T_2}{T_1 - T_2} \quad (\text{S3})$$

Using the reduction peaks of two sets of CV loops at 2 and 5  $\text{mV s}^{-1}$ , and at two different temperatures, respectively, we are able to estimate  $E_A$ . For instance, for the poly(4-HDPA)/AC electrode, the reduction peak intensities of CV curves at 2  $\text{mV s}^{-1}$  are 9.48  $\text{mA cm}^{-2}$  at 25 °C (298.15 K) and 7.53  $\text{mA cm}^{-2}$  at 15 °C (288.15 K). Hence, using Eq.(S3) we obtain  $E_A = 32.31 \text{ kJ mol}^{-1}$ . In the temperature range from 15 to 25 °C, the  $E_A$  is 33.99  $\text{kJ mol}^{-1}$ . Similarly, when using the CV curves at 5  $\text{mV s}^{-1}$ , we obtain  $E_A$  values of 31.08  $\text{kJ mol}^{-1}$  (25 - 15°C) and 34.30  $\text{kJ mol}^{-1}$  (15 - 5°C). Thus, the averaged  $E_A$  is 32.9  $\text{kJ mol}^{-1}$ . More information about parameters and calculation results for polymer cathodes can be found in Table S5 and S6.

## 1. Supporting Figures and Tables

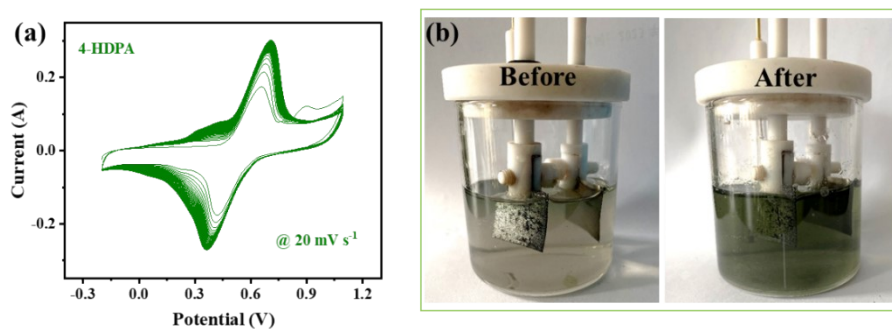

**Fig. S1.** (a) Evolution of CV loop in the electropolymerization process. (b) Optical photographs of a three-electrode cell before and after the electrodeposition of poly(4-HDPA).

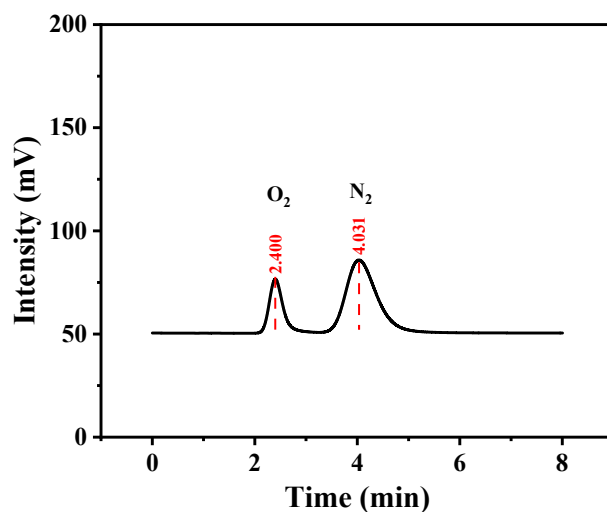

**Fig. S2.** GC spectrum of a Zn//poly(4-HDPA)/AC full cell after GCD test.

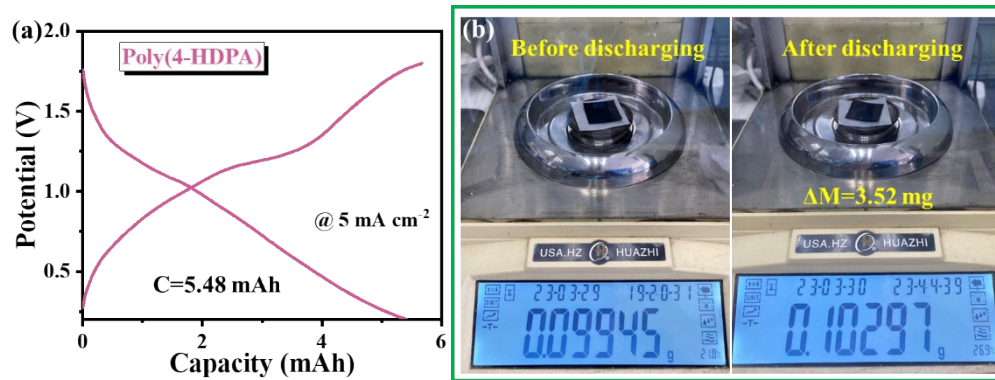

**Fig. S3.** (a) GCD curve of poly(4-HDPA) cathode at  $5 \text{ mA cm}^{-2}$ . (b) Weight of poly(4-HDPA)/AC cathode before discharging and after discharging.

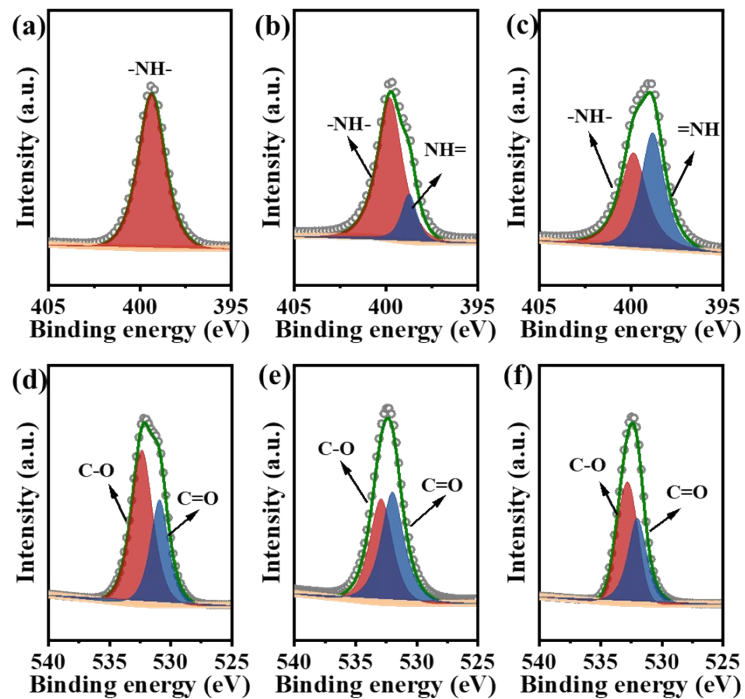

**Fig. S4.** (a-c) High-resolution N 1s XPS spectra collected from poly(4-HDPA), poly(4-AP), and poly(1,5-NAPD), respectively. (d-f) High-resolution O 1s XPS spectra collected from poly(4-HDPA), poly(4-AP), and poly(2,6-DHN), respectively.

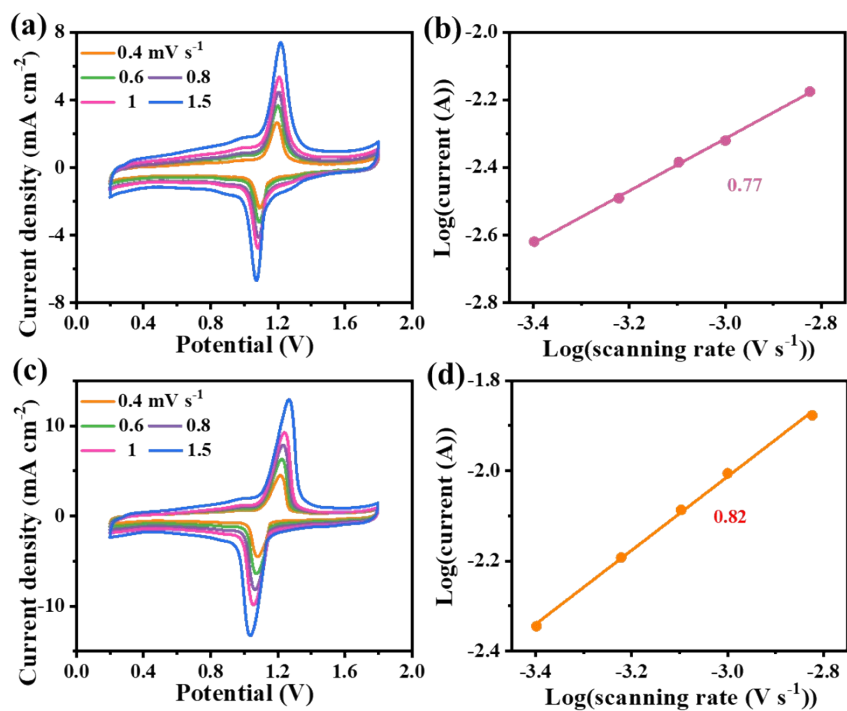

**Fig. S5.** (a) CV curves at scan rate ranging from 0.4 to 1.5 mV s<sup>-1</sup> and (b) b-value for reduction peak of Zn//poly(4-HDPA)/AC cell. (c) CV curves at scan rate ranging from 0.4 to 1.5 mV s<sup>-1</sup> and (d) b-value for reduction peak of Zn//poly(4-AP)/AC cell.

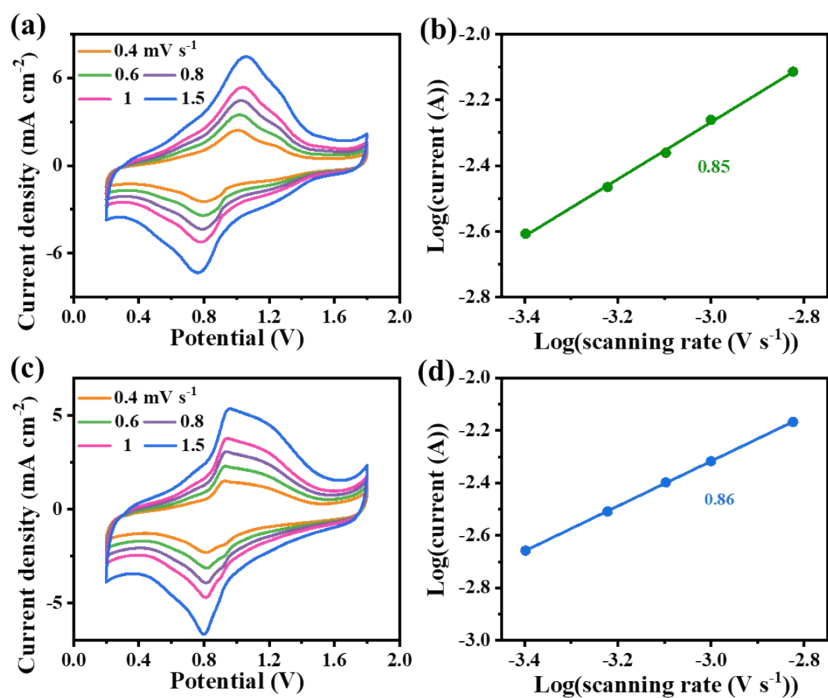

**Fig. S6.** (a, c) CV loops at low voltage scan rates from 0.4 to 1.5 mV s<sup>-1</sup> collected from Zn||poly(1,5-NAPD)/AC and Zn//poly(1,6-DHN)/AC cells, respectively. (b, d) Plots for deducing b-values using the reduction peaks of poly(1,5-NAPD) and poly(1,6-DHN), respectively.

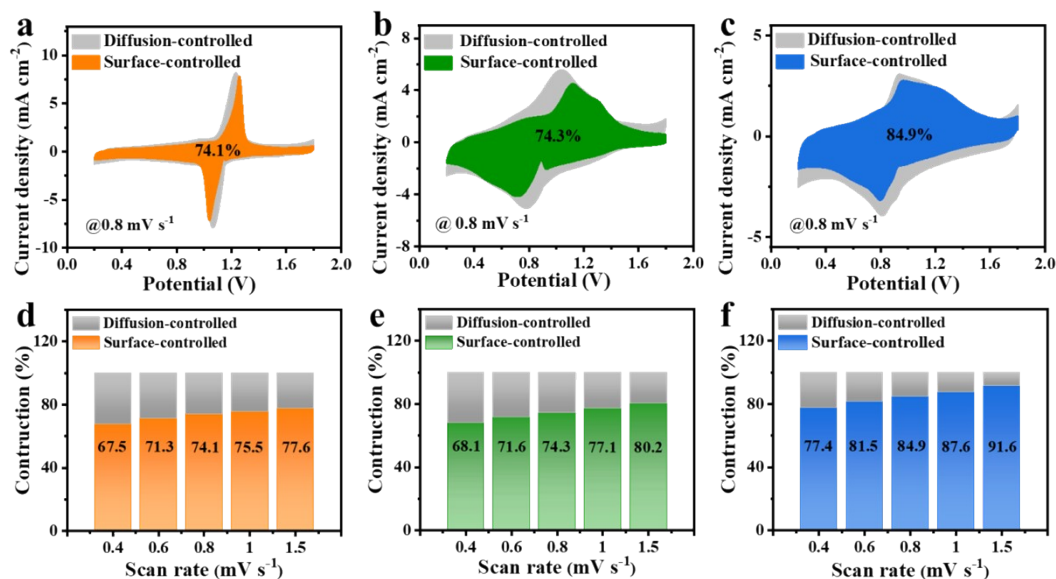

**Fig. S7.** (a-c) CV curves at 0.8 mV s<sup>-1</sup> showing the contribution fractions of diffusion-controlled and surface-controlled charge storage processes for poly(4-AP), poly(1,5-NAPD), and poly(1,6-DHN), respectively. (d-f) Specific contributions of the two types of charge storage processes at different voltage scan rates for poly(4-AP), poly(1,5-NAPD), and poly(1,6-DHN), respectively.

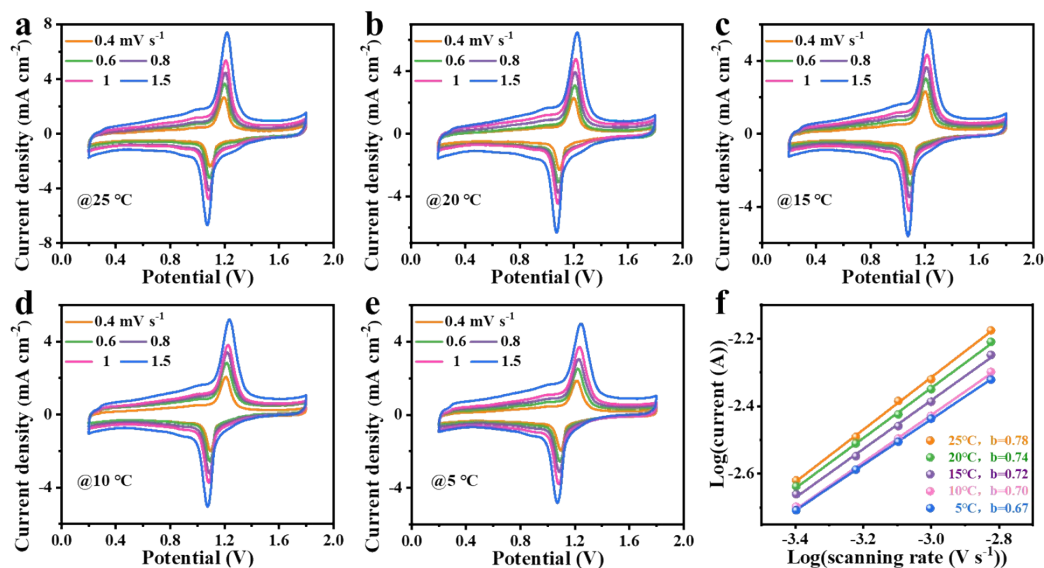

**Fig. S8.** CV curves collected from a Zn//poly(4-HDPA)/AC cell at (a) 25, (b) 20, (c) 15, (d) 10, and (e) 5 °C. (f) Plots for deducing b-values of the poly(4-HDPA)/AC cathode at different temperatures using the reduction peak intensities.

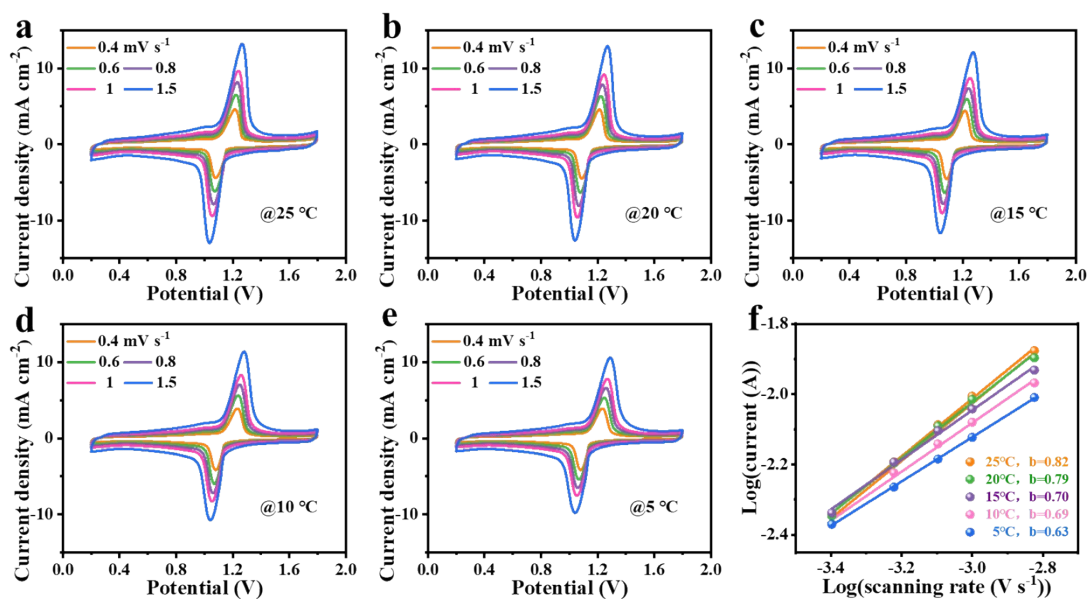

**Fig. S9.** CV curves collected from a Zn/poly(4-AP)/AC cell at (a) 25, (b) 20, (c) 15, (d) 10, and (e) 5 °C. (f) Plots for deducing b-values of the poly(4-AP)/AC cathode at different temperatures using the reduction peak intensities.

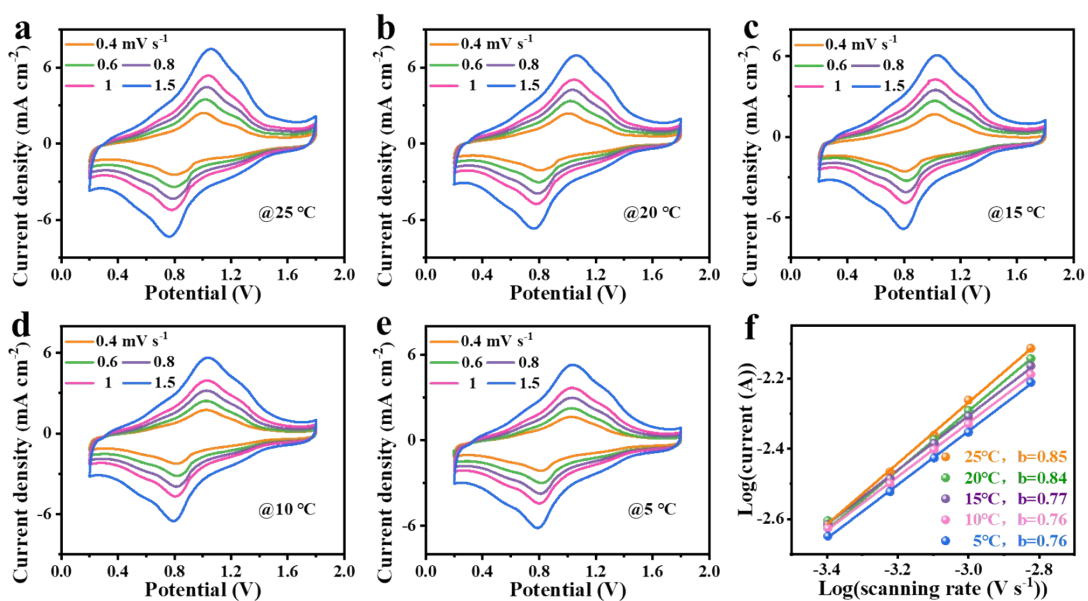

**Fig. S10.** CV curves collected from a Zn/poly(1,5-NAPD)/AC cell at (a) 25, (b) 20, (c) 15, (d) 10, and (e) 5 °C. (f) Plots for deducing b-values of the poly(1,5-NAPD)/AC cathode at different temperatures using the reduction peak intensities.



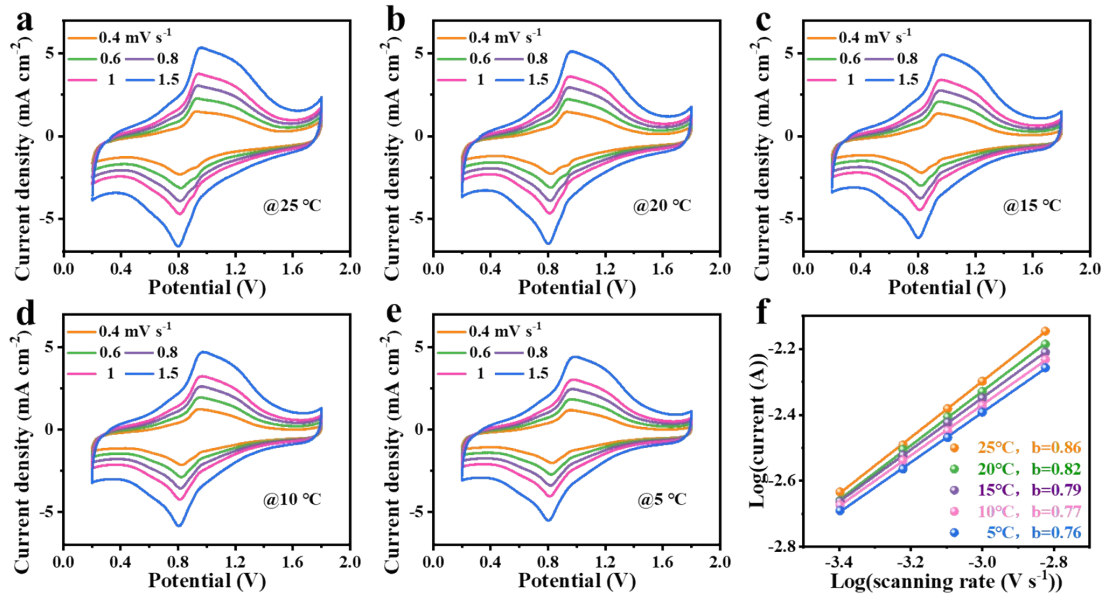

**Fig. S11.** CV curves collected from a Zn//poly(1,6-DHN)/AC cell at (a) 25, (b) 20, (c) 15, (d) 10, and (e) 5 °C. (f) Plots for deducing b-values of the poly(1,6-DHN)/AC cathode at different temperatures using the reduction peak intensities.

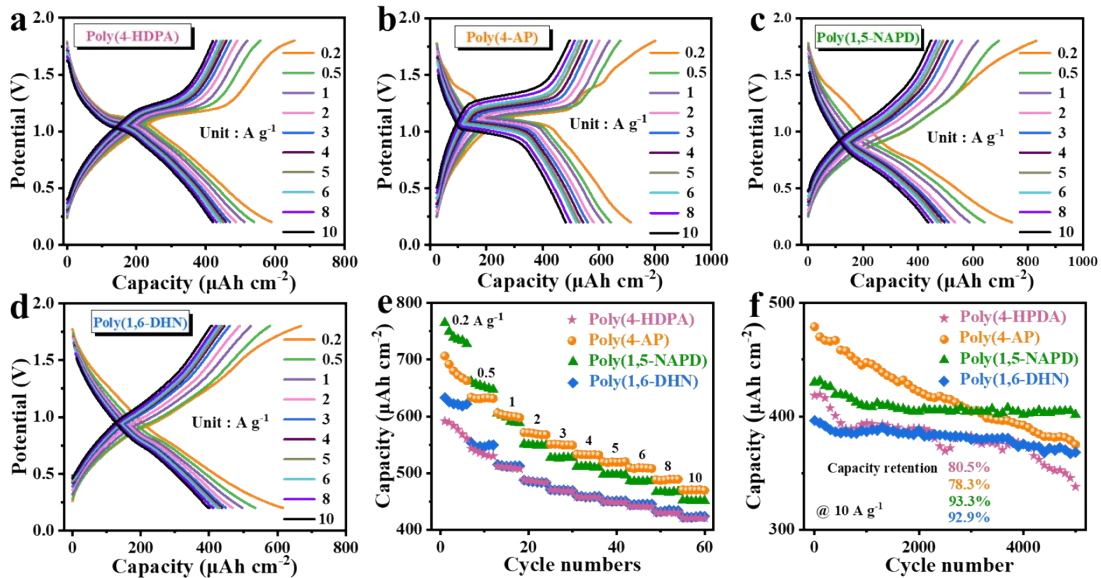

**Fig. S12.** GCD profiles at different current densities for (a) Zn//poly(4-HDPA)/AC, (b) Zn//poly(4-AP)/AC, (c) Zn//poly(1,5-NAPD)/AC and (d) Zn//poly(1,6-DHN)/AC cells. (e) Rate performances and (f) cycling stabilities of the four cells.

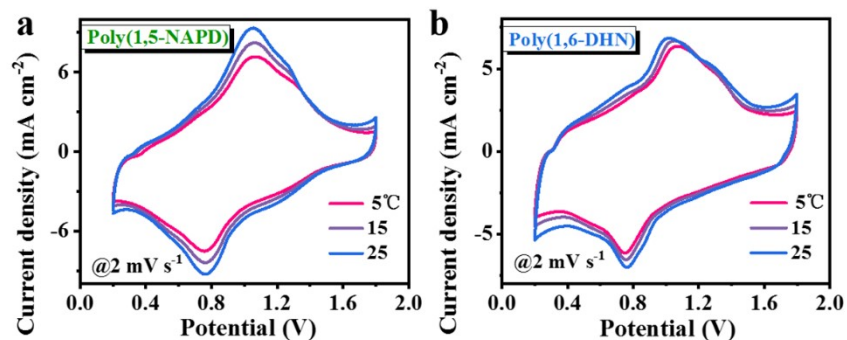

**Fig. S13.** Temperature-dependent CV loops at  $2 \text{ mV s}^{-1}$  collected from (a) Zn||poly(1,5-NAPD)/AC and (b) Zn||poly(1,6-DHN)/AC cells, respectively.

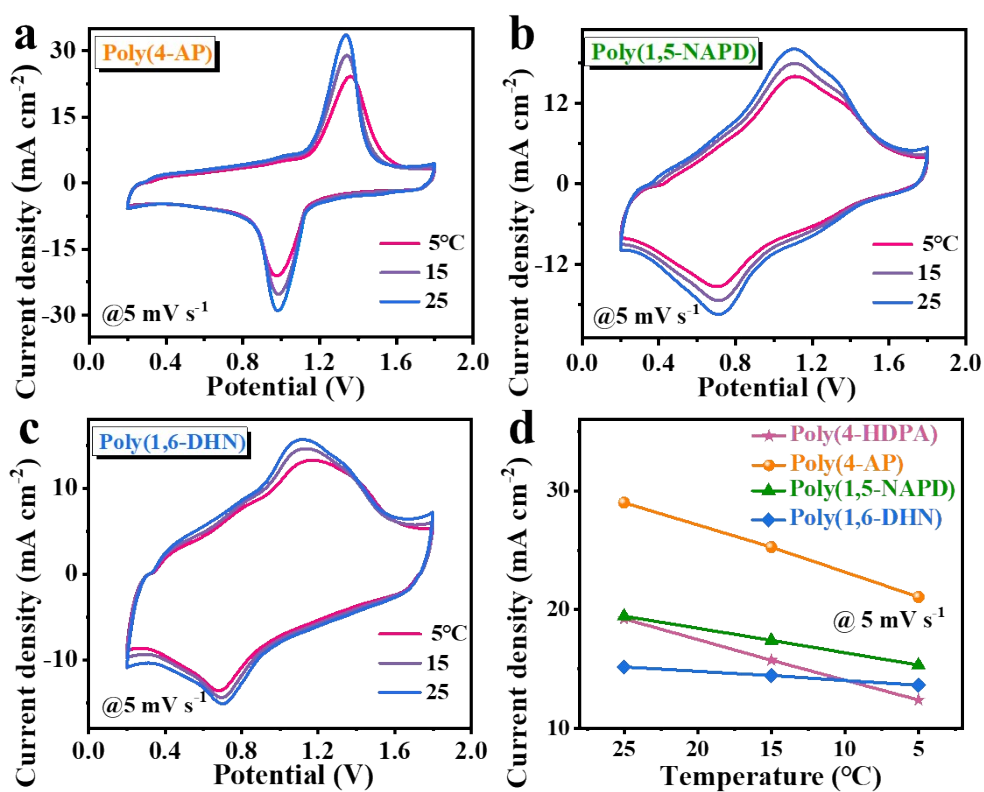

**Fig. S14.** (a-c) Temperature-dependent CV loops at  $5 \text{ mV s}^{-1}$  from Zn||poly(4-AP)/AC, Zn||poly(1,5-NAPD)/AC, and Zn||poly(1,6-DHN)/AC cells, respectively. (d) Plots of reduction peak current versus temperature at  $5 \text{ mV s}^{-1}$  for the Zn||poly(4-HPDA)/AC cell.

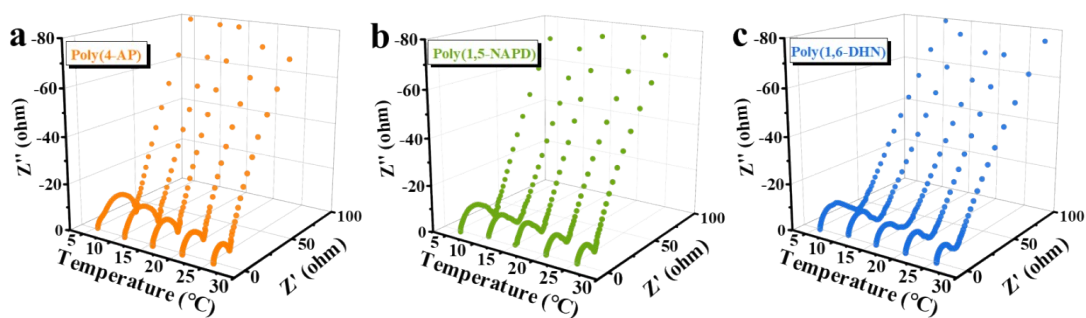

**Fig. S15.** Temperature-dependent EIS spectra of (a) Zn||poly(4-AP)/AC, (b) Zn||poly(1,5-NAPD)/AC, and (c) Zn||poly(1,6-DHN)/AC cells, respectively.

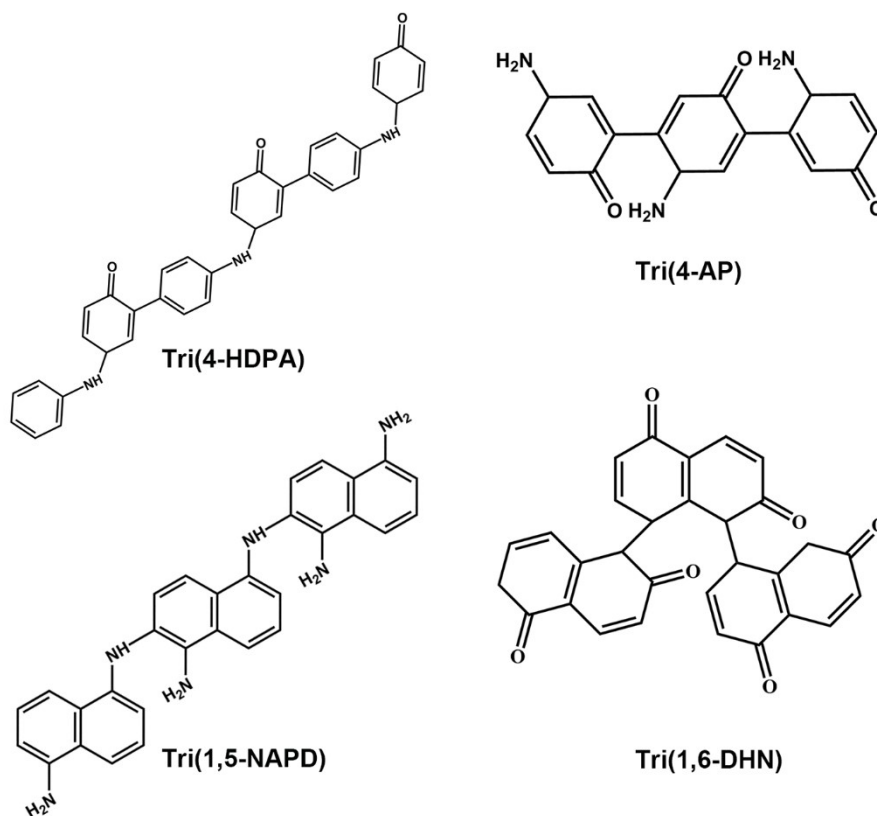

**Fig. S16.** Molecular structures of four trimers used in our calculation, sorted out from many possible structures according to the lowest-energy principle in polymerization.

**Table S1.** Experimental data of poly(4-HDPA) cathode for the calculated fractions of H<sup>+</sup> uptake.

| Sample                                 | Mass before discharge (g) | Mass after Discharge (g) | $\Delta M$ (mg) | Discharge Capacity (mAh) | Quantity of H <sup>+</sup> (mmol) | Quantity of Zn <sup>2+</sup> (mmol) | H <sup>+</sup> Percentag e (%) |
|----------------------------------------|---------------------------|--------------------------|-----------------|--------------------------|-----------------------------------|-------------------------------------|--------------------------------|
| 1                                      | 0.12887                   | 0.13239                  | 3.52            | 5.48                     | 0.0992                            | 0.0526                              | 65.34                          |
| 2                                      | 0.10859                   | 0.11068                  | 2.09            | 3.24                     | 0.0584                            | 0.0313                              | 65.13                          |
| 3                                      | 0.10974                   | 0.11187                  | 2.13            | 3.31                     | 0.0598                            | 0.0318                              | 65.25                          |
| 4                                      | 0.10768                   | 0.11005                  | 2.37            | 3.68                     | 0.0664                            | 0.0354                              | 65.21                          |
| 5                                      | 0.10975                   | 0.11227                  | 2.52            | 3.92                     | 0.0709                            | 0.0377                              | 65.30                          |
| 6                                      | 0.11449                   | 0.11765                  | 3.16            | 4.91                     | 0.0887                            | 0.0473                              | 65.25                          |
| 7                                      | 0.09795                   | 0.10082                  | 2.87            | 4.45                     | 0.0802                            | 0.0429                              | 65.14                          |
| 8                                      | 0.10247                   | 0.10512                  | 2.65            | 4.11                     | 0.0741                            | 0.0396                              | 65.15                          |
| 9                                      | 0.10644                   | 0.10897                  | 2.53            | 3.92                     | 0.0706                            | 0.0378                              | 65.11                          |
| 10                                     | 0.10426                   | 0.10672                  | 2.46            | 3.82                     | 0.0690                            | 0.0368                              | 65.22                          |
| <b>Averaged value: (65.21 ± 0.08)%</b> |                           |                          |                 |                          |                                   |                                     |                                |

**Table S2.** Experimental data of poly(4-AP) cathode for the calculated fractions of H<sup>+</sup> uptake.

| Sample | Mass before discharge (g) | Mass after Discharge (g) | $\Delta M$ (mg) | Discharge Capacity (mAh) | Quantity of H <sup>+</sup> (mmol) | Quantity of Zn <sup>2+</sup> (mmol) | H <sup>+</sup> Percentage (%) |
|--------|---------------------------|--------------------------|-----------------|--------------------------|-----------------------------------|-------------------------------------|-------------------------------|
| 1      | 0.10126                   | 0.10480                  | 3.54            | 5.42                     | 0.0963                            | 0.0530                              | 64.50                         |
| 2      | 0.10429                   | 0.10750                  | 3.21            | 4.94                     | 0.0883                            | 0.0480                              | 64.76                         |
| 3      | 0.10664                   | 0.10982                  | 3.18            | 4.87                     | 0.0865                            | 0.0476                              | 64.52                         |
| 4      | 0.09867                   | 0.1012                   | 2.53            | 3.88                     | 0.0691                            | 0.0379                              | 64.59                         |
| 5      | 0.10421                   | 0.10697                  | 2.76            | 4.23                     | 0.0752                            | 0.0413                              | 64.57                         |
| 6      | 0.10323                   | 0.10626                  | 3.03            | 4.64                     | 0.0824                            | 0.0453                              | 64.51                         |
| 7      | 0.10879                   | 0.11187                  | 3.08            | 4.73                     | 0.0843                            | 0.0461                              | 64.66                         |
| 8      | 0.10648                   | 0.10945                  | 2.97            | 4.54                     | 0.0805                            | 0.0445                              | 64.42                         |
| 9      | 0.10364                   | 0.10619                  | 2.55            | 3.92                     | 0.0700                            | 0.0382                              | 64.71                         |
| 10     | 0.10335                   | 0.10613                  | 2.78            | 4.27                     | 0.0761                            | 0.0416                              | 64.67                         |

**Averaged value: (64.59 ± 0.11)%**

**Table S3.** Experimental data of poly(1,5-NAPD) cathode for the calculated fractions of H<sup>+</sup> uptake.

| Sample                                 | Mass before discharge (g) | Mass after Discharge (g) | $\Delta M$ (mg) | Discharge Capacity (mAh) | Quantity of H <sup>+</sup> (mmol) | Quantity of Zn <sup>2+</sup> (mmol) | H <sup>+</sup> Percentage (%) |
|----------------------------------------|---------------------------|--------------------------|-----------------|--------------------------|-----------------------------------|-------------------------------------|-------------------------------|
| 1                                      | 0.09846                   | 0.10159                  | 3.13            | 4.61                     | 0.07811                           | 0.047                               | 62.46                         |
| 2                                      | 0.08689                   | 0.0895                   | 2.61            | 3.84                     | 0.06498                           | 0.0392                              | 62.40                         |
| 3                                      | 0.09934                   | 0.10228                  | 2.94            | 4.31                     | 0.07259                           | 0.0441                              | 62.20                         |
| 4                                      | 0.09867                   | 0.10110                  | 2.43            | 3.58                     | 0.06068                           | 0.0365                              | 62.47                         |
| 5                                      | 0.09986                   | 0.10275                  | 2.89            | 4.24                     | 0.07149                           | 0.0434                              | 62.24                         |
| 6                                      | 0.09949                   | 0.10252                  | 3.03            | 4.47                     | 0.0759                            | 0.0454                              | 62.55                         |
| 7                                      | 0.09916                   | 0.10234                  | 3.18            | 4.68                     | 0.07922                           | 0.0477                              | 62.41                         |
| 8                                      | 0.09855                   | 0.10152                  | 2.97            | 4.38                     | 0.07434                           | 0.0445                              | 62.53                         |
| 9                                      | 0.09946                   | 0.10201                  | 2.55            | 3.75                     | 0.06342                           | 0.0383                              | 62.37                         |
| 10                                     | 0.09984                   | 0.10252                  | 2.68            | 3.94                     | 0.0666                            | 0.0402                              | 62.36                         |
| <b>Averaged value: (62.40 ± 0.11)%</b> |                           |                          |                 |                          |                                   |                                     |                               |

**Table S4.** Experimental data of poly(1,6-DHN) cathode for the calculated fractions of H<sup>+</sup> uptake.

| Sample                                 | Mass before discharge (g) | Mass after Discharge (g) | $\Delta M$ (mg) | Discharge Capacity (mAh) | Quantity of H <sup>+</sup> (mmol) | Quantity of Zn <sup>2+</sup> (mmol) | H <sup>+</sup> Percentage (%) |
|----------------------------------------|---------------------------|--------------------------|-----------------|--------------------------|-----------------------------------|-------------------------------------|-------------------------------|
| 1                                      | 0.10246                   | 0.10471                  | 2.25            | 3.28                     | 0.0545                            | 0.0338                              | 61.89                         |
| 2                                      | 0.10689                   | 0.10911                  | 2.22            | 3.24                     | 0.0543                            | 0.0333                              | 61.95                         |
| 3                                      | 0.11934                   | 0.12147                  | 2.13            | 3.10                     | 0.0517                            | 0.0320                              | 61.80                         |
| 4                                      | 0.11868                   | 0.12101                  | 2.33            | 3.39                     | 0.0565                            | 0.0350                              | 61.78                         |
| 5                                      | 0.10975                   | 0.11267                  | 2.92            | 4.26                     | 0.0713                            | 0.0438                              | 61.93                         |
| 6                                      | 0.10949                   | 0.11250                  | 3.01            | 4.38                     | 0.0731                            | 0.0452                              | 61.79                         |
| 7                                      | 0.09997                   | 0.10302                  | 3.05            | 4.45                     | 0.0745                            | 0.0458                              | 61.93                         |
| 8                                      | 0.10247                   | 0.10544                  | 2.97            | 4.33                     | 0.0724                            | 0.0446                              | 61.89                         |
| 9                                      | 0.10334                   | 0.10587                  | 2.53            | 3.69                     | 0.0617                            | 0.0380                              | 61.91                         |
| 10                                     | 0.10326                   | 0.10583                  | 2.57            | 3.75                     | 0.0624                            | 0.0386                              | 61.94                         |
| <b>Averaged value: (61.88 ± 0.07)%</b> |                           |                          |                 |                          |                                   |                                     |                               |

**Table S5.** Reduction peak current ( $I_p$ ) densities and calculated activation energies for poly(4-HDPA) and poly(4-AP) cathodes.

|                                                      | 25 °C       | 15 °C | 5 °C  |                     |
|------------------------------------------------------|-------------|-------|-------|---------------------|
| $I_p@2 \text{ mV s}^{-1}$<br>(mA cm <sup>-2</sup> )  | 9.48        | 7.53  | 5.94  | <b>Poly(4-HDPA)</b> |
| $I_p@5 \text{ mV s}^{-1}$<br>(mA cm <sup>-2</sup> )  | 19.22       | 15.73 | 12.38 |                     |
| $E_A@2 \text{ mV s}^{-1}$<br>(kJ mol <sup>-1</sup> ) | 32.31       |       | 33.99 |                     |
| $E_A@5 \text{ mV s}^{-1}$<br>(kJ mol <sup>-1</sup> ) | 31.08       |       | 34.30 |                     |
| Averaged $E_A$<br>(kJ mol <sup>-1</sup> )            | <b>32.9</b> |       |       |                     |
| $I_p@2 \text{ mV s}^{-1}$<br>(mA cm <sup>-2</sup> )  | 16.09       | 8.39  | 7.52  | <b>Poly(4-AP)</b>   |
| $I_p@5 \text{ mV s}^{-1}$<br>(mA cm <sup>-2</sup> )  | 29.02       | 25.26 | 21.06 |                     |
| $E_A@2 \text{ mV s}^{-1}$<br>(kJ mol <sup>-1</sup> ) | 22.52       |       | 24.28 |                     |
| $E_A@5 \text{ mV s}^{-1}$<br>(kJ mol <sup>-1</sup> ) | 22.16       |       | 26.58 |                     |
| Averaged $E_A$<br>(kJ mol <sup>-1</sup> )            | <b>23.9</b> |       |       |                     |



**Table S6.** Reduction peak current densities and calculated activation energies for poly(1,5-NAPD) and poly(1,6-DHN).

|                                                      | 25 °C       | 15 °C | 5 °C  |                       |
|------------------------------------------------------|-------------|-------|-------|-----------------------|
| $I_p@2 \text{ mV s}^{-1}$<br>(mA cm <sup>-2</sup> )  | 9.27        | 8.39  | 7.52  | <b>Poly(1,5-NAPD)</b> |
| $I_p@5 \text{ mV s}^{-1}$<br>(mA cm <sup>-2</sup> )  | 19.45       | 17.41 | 15.32 |                       |
| $E_A@2 \text{ mV s}^{-1}$<br>(kJ mol <sup>-1</sup> ) | 16.68       |       | 16.64 |                       |
| $E_A@5 \text{ mV s}^{-1}$<br>(kJ mol <sup>-1</sup> ) | 18.26       |       | 19.40 |                       |
| Averaged $E_A$<br>(kJ mol <sup>-1</sup> )            | <b>17.7</b> |       |       |                       |
| $I_p@2 \text{ mV s}^{-1}$<br>(mA cm <sup>-2</sup> )  | 7.02        | 6.55  | 6.15  | <b>Poly(1,6-DHN)</b>  |
| $I_p@5 \text{ mV s}^{-1}$<br>(mA cm <sup>-2</sup> )  | 15.16       | 14.44 | 13.62 |                       |
| $E_A@2 \text{ mV s}^{-1}$<br>(kJ mol <sup>-1</sup> ) | 12.34       |       | 10.75 |                       |
| $E_A@5 \text{ mV s}^{-1}$<br>(kJ mol <sup>-1</sup> ) | 9.39        |       | 10.15 |                       |
| Averaged $E_A$<br>(kJ mol <sup>-1</sup> )            | <b>10.7</b> |       |       |                       |
